# Supplementary material for: A chemical–biological similarity-based grouping of complex substances as a prototype approach for evaluating chemical alternatives
Source: PubMed Central journal article supplement — Green Chem. 2016 May 16;18(16):4407–19. doi: 10.1039/c6gc01147k (PMC5179981; doi:10.1039/c6gc01147k), 2016-05-16
Supplement: GC-018-C6GC01147K-s001.pdf [file GC-018-C6GC01147K-s001.pdf]

A chemical-biological similarity-based grouping of complex substances as a  
prototype approach for evaluating chemical alternatives

**- Supplementary Information -**

Fabian A. Grimm<sup>1</sup>, Yasuhiro Iwata<sup>1</sup>, Oksana Sirenko<sup>2</sup>, Grace A. Chappell<sup>1</sup>, Fred A. Wright<sup>3</sup>,  
David M. Reif<sup>3</sup>, John Braisted<sup>4</sup>, David L. Gerhold<sup>4</sup>, Joanne M. Yeakley<sup>5</sup>,  
Peter Shepard<sup>5</sup>, Bruce Seligmann<sup>5</sup>, Tim Roy<sup>6</sup>,  
Peter J. Boogaard<sup>7</sup>, Hans B. Ketelslegers<sup>8</sup>, Arlean M. Rohde<sup>9</sup>, Ivan Rusyn<sup>1</sup>

<sup>1</sup>Department of Veterinary Integrative Biosciences, Texas A&M University, College Station, TX

<sup>2</sup>Molecular Devices LLC, Sunnyvale, CA

<sup>3</sup>Bioinformatics Research Center, North Carolina State University, Raleigh, NC

<sup>4</sup>National Institutes of Health, National Center for Advancing Translational Sciences, Bethesda,  
MD

<sup>5</sup>BioSpyder Technologies Inc., Carlsbad, CA

<sup>6</sup>Department of Natural Science, University of South Carolina, Beaufort, SC

<sup>7</sup>SHELL International BV, The Hague, NL

<sup>8</sup>European Petroleum Refiners Association, Concawe Division, Brussels, BE

<sup>9</sup>ExxonMobil Chemical Co., Spring, TX

Address correspondence to:

Ivan Rusyn, MD, PhD  
Department of Veterinary Integrative Biosciences  
4458 TAMU  
Texas A&M University  
College Station, TX 77843  
(979) 458-9866  
irusyn@cvm.tamu.edu

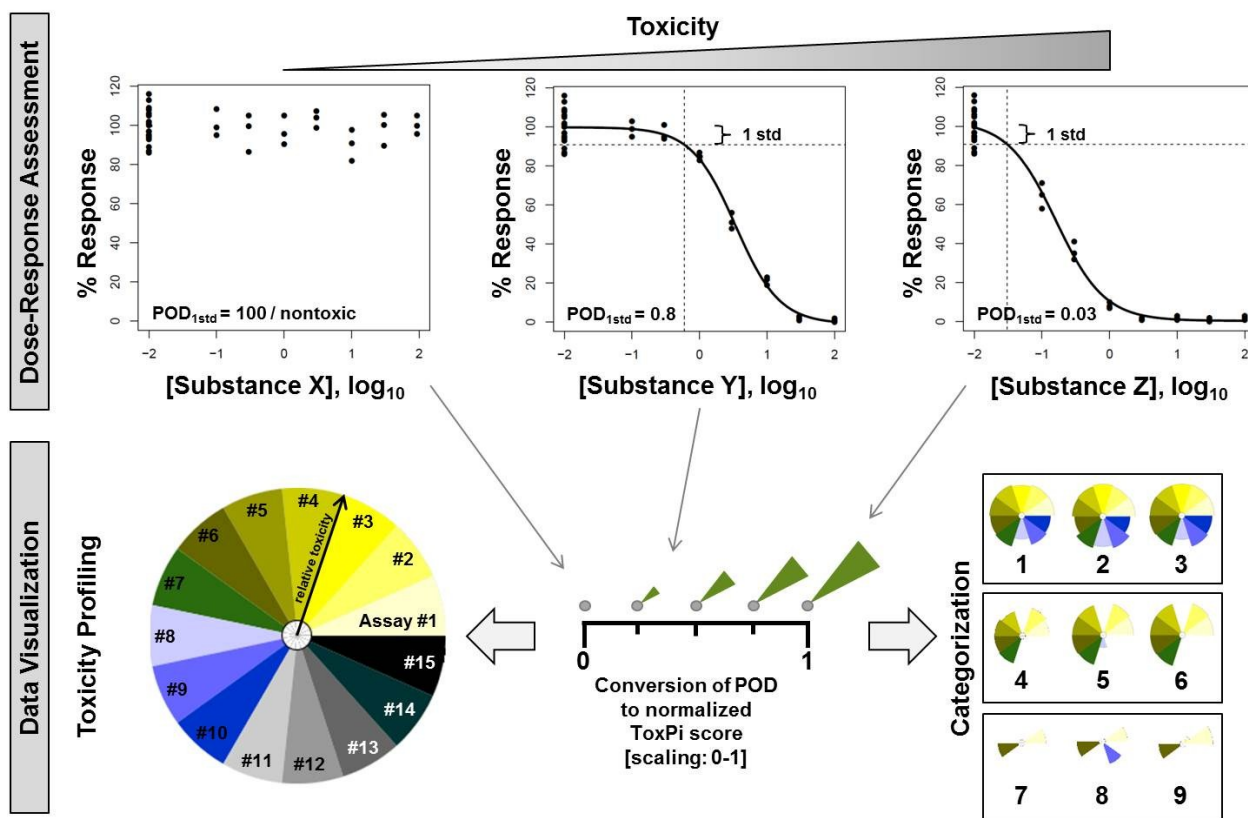

**Figure S1:** Computational data integration and bioactivity profiling in ToxPi.

Curve-fitting of quantitative outputs from HCS applications (**data acquisition, concentration-response assessment**) in R yielded point-of-departure (POD) benchmark values, which were utilized as relative measures of toxicity. Following normalization of POD values on a 0-1 scale, values derived from sixteen distinct assays or assay parameters were integrated for quantitative bioactivity profiling in ToxPi (**data visualization**). In the resulting ToxPi charts, each slice is representative of an individual assay and the area of the slice is proportional to the relative bioactivity of the chemical within the dataset. ToxPi also provides a cumulative ToxPi score, a relative measure of bioactivity that can be utilized to globally rank chemicals for potential clustering. Ranking chemicals according to their overall ToxPi score can be utilized to reveal clusters of similar compounds or substances.

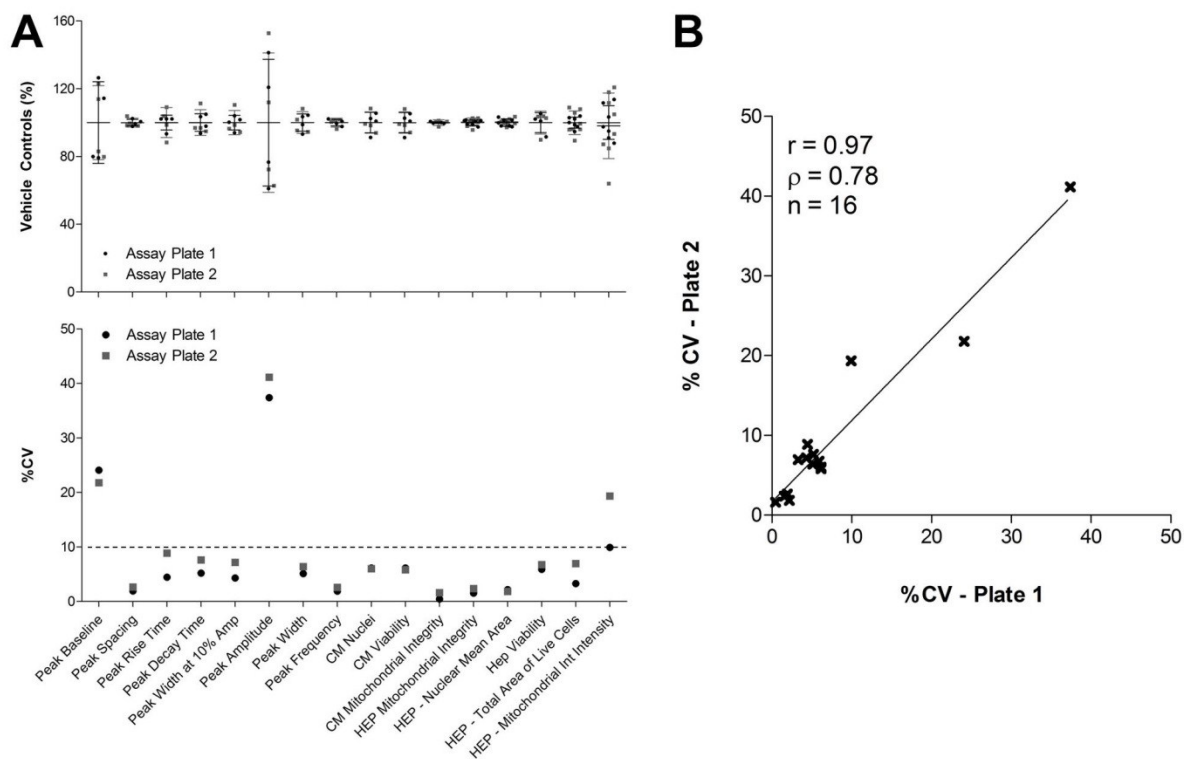

**Figure S2:** Inter-plate replicability parameters.

Assay performance between assay plates was evaluated using comparisons of normalized controls and coefficients of variation (%CV), an assay quality indicator herein defined as a single standard deviation across the mean of vehicle controls (**A**). Pearson ( $r$ ) and Spearman ( $\rho$ ) correlation analysis was used as an additional quality control to assess the assay reproducibility between plates. [CM=cardiomyocytes; HEP=hepatocytes].

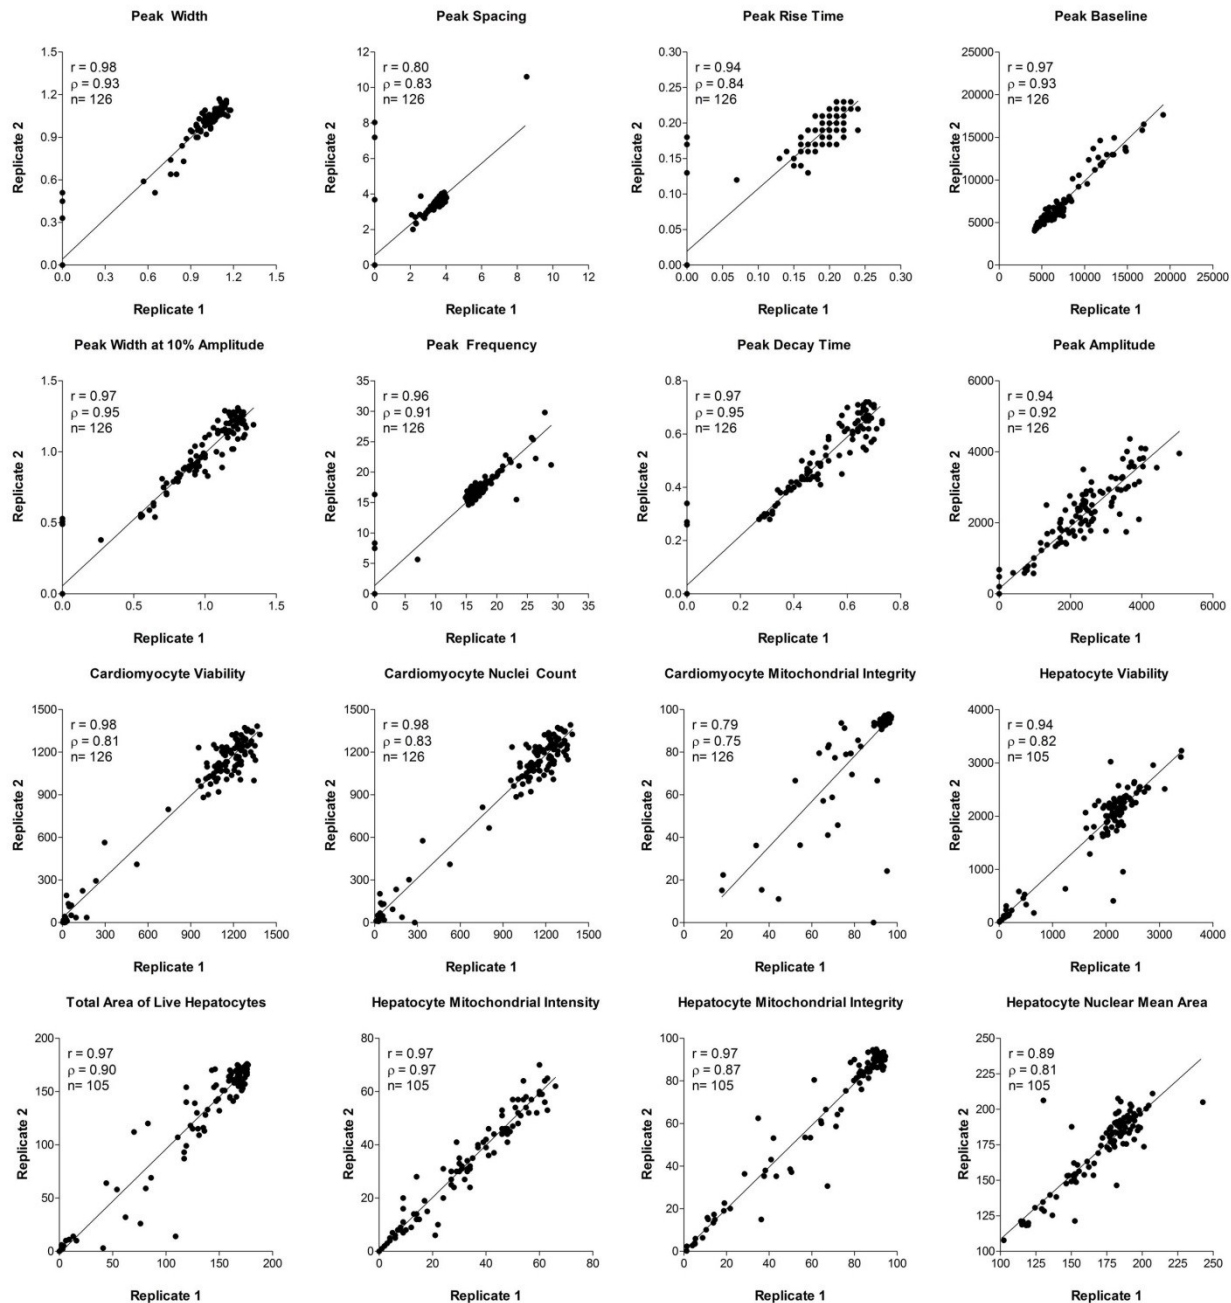

**Figure S3:** Intra-plate replicability parameters.

The consistency of replicates in high-content screening assays was determined using linear correlation analysis ( $r$ =Pearson;  $\rho$ =Spearman) for each assay parameter. Plots depict correlations for original, non-normalized duplicate ( $n=2$ ) measurements in concentration-response ( $n=6$  concentrations for cardiomyocytes,  $n=5$  for hepatocytes) for all 21 Concawe extracts and sixteen assay parameters.

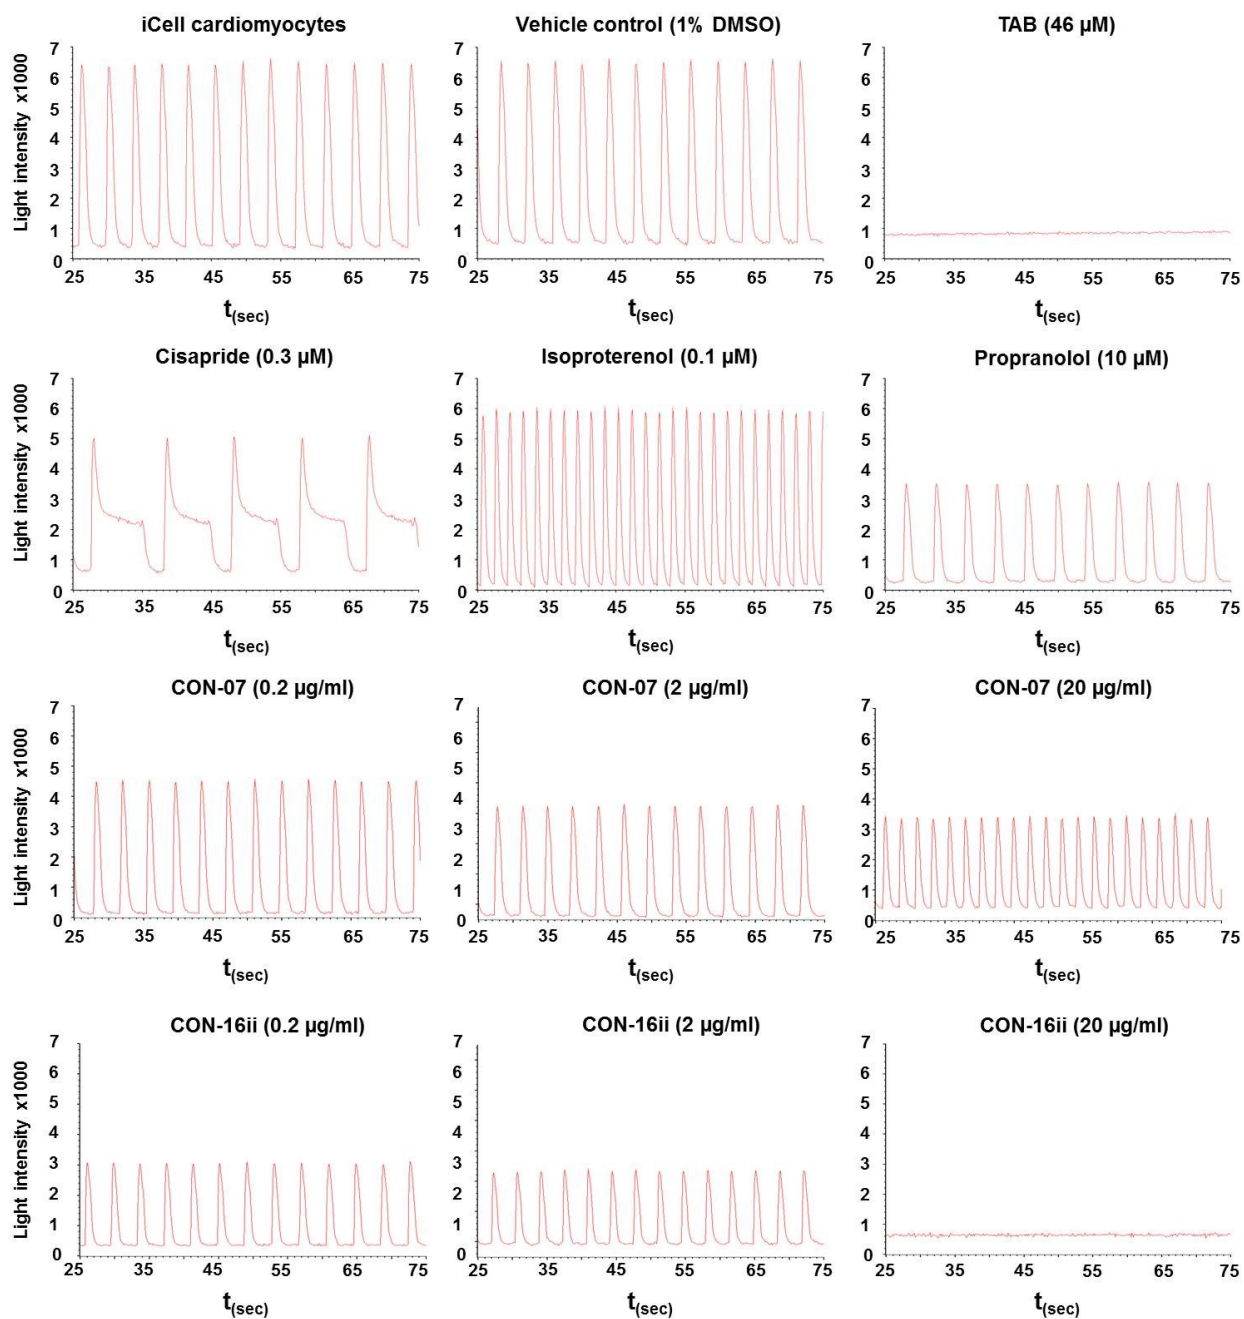

**Figure S4:** Calcium-flux traces for control chemicals and two petroleum substances. Representative calcium flux-traces for cultured iPSC cardiomyocytes in the presence and absence of vehicle (1% DMSO in media), reference chemicals (tetraoctyl ammonium bromide – cytotoxicity; cisapride – QT interval elongation; isoproterenol – positive chronotrope; propranolol – negative chronotrope) and two petroleum substances, CON-07 (OGO) and CON-16ii (VHGO), in concentration-response are shown.

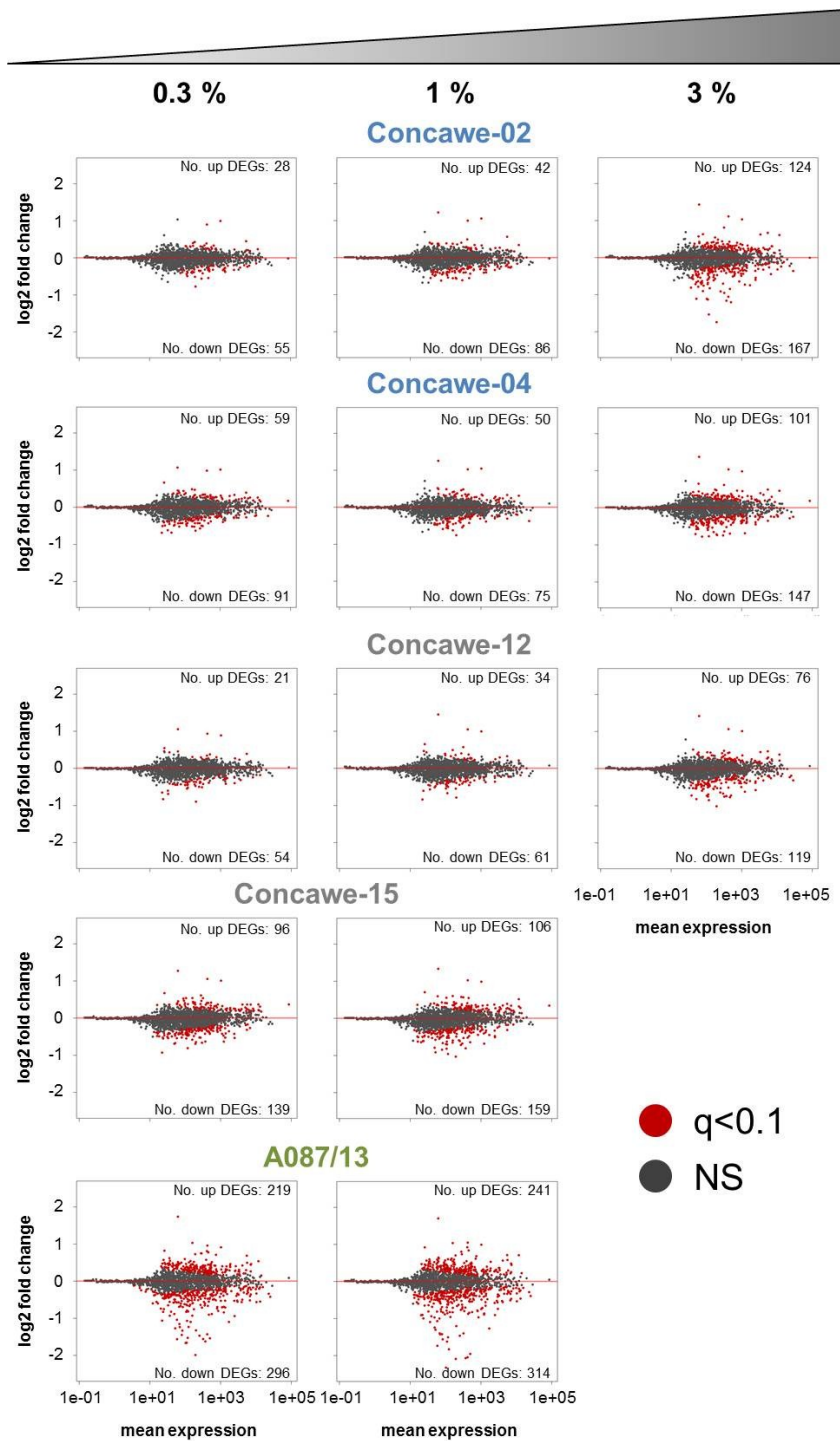

**Figure S5:** MA plots, which demonstrate the gene expression data transformed onto the M (log ratios) and the A (mean average) scale, show the change in the average level of each transcript in the S1500+ gene set for all chemicals at all concentrations relative to the averages determined for DMSO controls. Differentially expressed genes ( $q < 0.1$ ), determined as described in the Materials and Methods section, are indicated by red points.

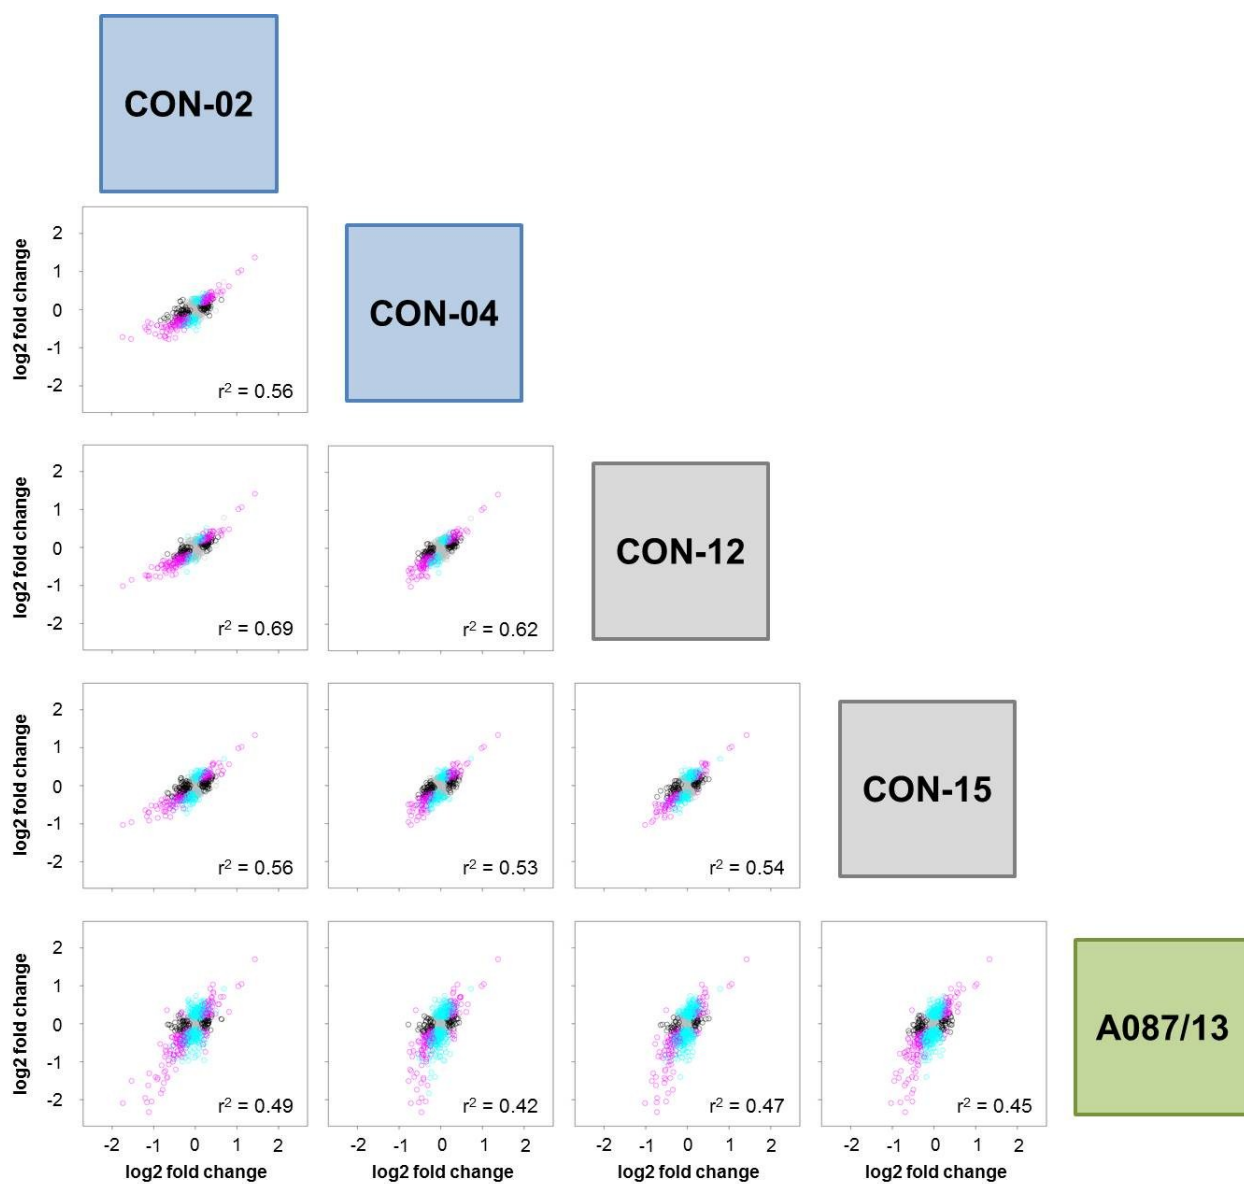

**Figure S6:** Correlation plots of  $\log_2$ (fold change) for combinations of all chemicals at the highest dose used. Colors indicate significantly differentially expressed genes for either (aqua and black) or both (pink) chemicals in each comparison.  $r^2$ =coefficient of determination (squared Pearson correlation).

**Table S1: Common differentially expressed genes\***

| Gene     | Mean count | Con-02 |          | Con-04 |          | Con-12 |          | Con-15 |          | A087/13 |          |
|----------|------------|--------|----------|--------|----------|--------|----------|--------|----------|---------|----------|
|          |            | log2FC | q-value  | log2FC | q-value  | log2FC | q-value  | log2FC | q-value  | log2FC  | q-value  |
| TIPARP   | 61.95      | 1.43   | 2.55E-18 | 1.37   | 5.10E-16 | 1.42   | 3.68E-17 | 1.33   | 4.15E-15 | 1.70    | 1.53E-26 |
| UGT1A1   | 424.06     | 1.11   | 2.22E-12 | 1.03   | 5.70E-10 | 1.06   | 1.32E-10 | 1.02   | 6.48E-10 | 1.05    | 2.23E-11 |
| UGT1A6   | 1027.24    | 1.03   | 4.84E-11 | 0.98   | 2.84E-09 | 1.01   | 4.69E-10 | 0.99   | 1.72E-09 | 0.99    | 1.54E-10 |
| CD44     | 317.20     | 0.81   | 4.90E-10 | 0.61   | 1.87E-05 | 0.48   | 1.61E-03 | 0.57   | 8.81E-05 | 0.31    | 3.34E-02 |
| AKRIC1   | 5518.76    | 0.67   | 4.73E-14 | 0.49   | 4.44E-07 | 0.47   | 1.23E-06 | 0.39   | 8.81E-05 | 0.71    | 3.56E-16 |
| SQSTM1   | 11720.95   | 0.61   | 8.20E-15 | 0.46   | 9.43E-08 | 0.38   | 1.21E-05 | 0.51   | 6.48E-10 | 0.71    | 1.91E-20 |
| ATF3     | 60.12      | 0.57   | 6.16E-04 | 0.65   | 1.49E-04 | 0.44   | 2.01E-02 | 0.60   | 5.57E-04 | 0.51    | 1.56E-03 |
| CDKN1A   | 279.08     | 0.44   | 4.22E-04 | 0.29   | 4.12E-02 | 0.41   | 2.03E-03 | 0.57   | 3.34E-06 | 0.80    | 6.95E-13 |
| ASAH1    | 448.02     | 0.43   | 2.05E-05 | 0.30   | 7.67E-03 | 0.43   | 3.04E-05 | 0.55   | 6.58E-08 | 0.84    | 2.84E-20 |
| AQP3     | 159.39     | 0.42   | 1.23E-03 | 0.40   | 4.43E-03 | 0.35   | 1.65E-02 | 0.60   | 3.23E-06 | 1.04    | 3.04E-20 |
| LOXL1    | 105.84     | 0.40   | 6.97E-03 | 0.37   | 2.25E-02 | 0.44   | 5.10E-03 | 0.55   | 1.70E-04 | 0.46    | 1.23E-03 |
| VMP1     | 740.70     | 0.40   | 9.61E-06 | 0.46   | 5.59E-07 | 0.29   | 4.29E-03 | 0.30   | 3.04E-03 | 0.68    | 2.47E-16 |
| TSKU     | 413.15     | 0.36   | 8.00E-03 | 0.31   | 3.67E-02 | 0.42   | 2.89E-03 | 0.41   | 3.80E-03 | 0.92    | 9.21E-16 |
| CTSA     | 7129.24    | 0.31   | 3.74E-06 | 0.30   | 3.05E-05 | 0.25   | 8.01E-04 | 0.34   | 6.37E-07 | 0.48    | 6.48E-15 |
| CCDC92   | 834.83     | 0.27   | 5.23E-04 | 0.32   | 9.06E-05 | 0.24   | 5.72E-03 | 0.32   | 7.91E-05 | -0.19   | 1.97E-02 |
| HLA-A    | 6206.69    | 0.24   | 5.21E-03 | 0.22   | 2.12E-02 | 0.18   | 8.83E-02 | 0.26   | 4.17E-03 | -0.28   | 4.89E-04 |
| NFE2L2   | 2389.85    | 0.23   | 2.44E-02 | 0.22   | 5.13E-02 | 0.21   | 6.05E-02 | 0.37   | 1.33E-04 | 0.27    | 4.29E-03 |
| CHCHD1   | 536.12     | 0.23   | 5.67E-02 | 0.33   | 3.79E-03 | 0.23   | 7.50E-02 | 0.23   | 6.99E-02 | 0.47    | 1.64E-06 |
| ARPC4    | 684.54     | 0.20   | 1.55E-02 | 0.19   | 3.60E-02 | 0.21   | 1.99E-02 | 0.21   | 2.36E-02 | 0.29    | 1.48E-04 |
| RPL27    | 5539.64    | -0.17  | 9.61E-02 | -0.35  | 7.78E-05 | -0.20  | 5.04E-02 | -0.31  | 5.57E-04 | -0.33   | 5.68E-05 |
| C1R      | 2956.12    | -0.31  | 7.57E-03 | -0.32  | 7.01E-03 | -0.26  | 3.68E-02 | -0.25  | 5.03E-02 | -0.56   | 1.49E-08 |
| YIF1A    | 541.26     | -0.32  | 5.77E-04 | -0.27  | 7.67E-03 | -0.25  | 1.35E-02 | -0.31  | 1.43E-03 | -0.32   | 4.16E-04 |
| HAX1     | 1031.13    | -0.32  | 1.10E-04 | -0.39  | 2.50E-06 | -0.25  | 5.72E-03 | -0.24  | 1.12E-02 | -0.49   | 2.74E-10 |
| ITPR2    | 112.26     | -0.32  | 3.63E-02 | -0.41  | 8.16E-03 | -0.39  | 1.31E-02 | -0.32  | 5.77E-02 | -0.62   | 3.88E-06 |
| HSPA4    | 115.12     | -0.34  | 9.25E-03 | -0.44  | 1.18E-03 | -0.33  | 1.83E-02 | -0.31  | 3.78E-02 | -0.28   | 3.17E-02 |
| TRIB3    | 1353.78    | -0.36  | 3.24E-02 | -0.41  | 1.40E-02 | -0.39  | 2.20E-02 | -0.38  | 3.01E-02 | -0.66   | 3.76E-06 |
| NRP1     | 116.82     | -0.37  | 1.81E-02 | -0.33  | 4.62E-02 | -0.32  | 6.86E-02 | -0.33  | 5.52E-02 | -0.51   | 3.31E-04 |
| FAIM     | 495.86     | -0.39  | 1.42E-03 | -0.29  | 2.92E-02 | -0.29  | 3.42E-02 | -0.37  | 4.04E-03 | -0.48   | 3.05E-05 |
| GGH      | 810.03     | -0.40  | 3.99E-05 | -0.23  | 4.56E-02 | -0.31  | 3.68E-03 | -0.21  | 8.02E-02 | -0.80   | 7.50E-19 |
| GNG5     | 958.66     | -0.43  | 2.24E-05 | -0.36  | 1.10E-03 | -0.39  | 3.28E-04 | -0.35  | 1.64E-03 | -0.28   | 8.24E-03 |
| KPNA2    | 1101.99    | -0.44  | 2.40E-09 | -0.20  | 1.96E-02 | -0.27  | 9.65E-04 | -0.31  | 1.28E-04 | -0.72   | 1.42E-23 |
| CKS1B    | 113.29     | -0.44  | 6.59E-03 | -0.31  | 8.38E-02 | -0.42  | 1.55E-02 | -0.39  | 3.00E-02 | -0.53   | 4.13E-04 |
| ICT1     | 630.07     | -0.45  | 1.81E-04 | -0.24  | 9.19E-02 | -0.28  | 5.04E-02 | -0.26  | 6.38E-02 | -0.35   | 3.08E-03 |
| PACSIN3  | 51.61      | -0.47  | 1.19E-02 | -0.49  | 1.16E-02 | -0.54  | 5.72E-03 | -0.58  | 2.19E-03 | -0.50   | 4.51E-03 |
| COL4A2   | 112.60     | -0.47  | 9.90E-04 | -0.46  | 2.44E-03 | -0.70  | 5.55E-07 | -0.49  | 1.20E-03 | -0.86   | 1.47E-10 |
| COL4A1   | 200.77     | -0.47  | 2.24E-05 | -0.74  | 4.44E-11 | -0.53  | 2.95E-06 | -0.49  | 3.24E-05 | -1.20   | 4.55E-28 |
| PSIP1    | 562.54     | -0.51  | 1.13E-06 | -0.41  | 3.64E-04 | -0.28  | 2.13E-02 | -0.26  | 3.86E-02 | -0.83   | 1.61E-16 |
| CENPW    | 57.55      | -0.52  | 1.42E-03 | -0.42  | 1.96E-02 | -0.44  | 1.35E-02 | -0.42  | 2.26E-02 | -0.81   | 7.01E-08 |
| PHGDH    | 157.88     | -0.53  | 1.46E-03 | -0.34  | 7.43E-02 | -0.54  | 2.04E-03 | -0.65  | 8.76E-05 | -0.83   | 3.19E-08 |
| TPX2     | 67.02      | -0.54  | 9.90E-04 | -0.35  | 6.76E-02 | -0.43  | 1.89E-02 | -0.55  | 1.43E-03 | -1.00   | 2.55E-11 |
| EIF4EBP1 | 2486.05    | -0.54  | 1.03E-05 | -0.45  | 7.99E-04 | -0.58  | 3.29E-06 | -0.51  | 8.46E-05 | -0.91   | 1.12E-15 |
| SMC4     | 41.74      | -0.58  | 7.19E-04 | -0.46  | 1.32E-02 | -0.53  | 4.39E-03 | -0.53  | 3.77E-03 | -0.69   | 2.01E-05 |



|           |         |       |          |       |          |       |          |       |          |       |          |
|-----------|---------|-------|----------|-------|----------|-------|----------|-------|----------|-------|----------|
| CDH1      | 107.46  | -0.60 | 2.76E-05 | -0.55 | 3.45E-04 | -0.40 | 1.47E-02 | -0.82 | 2.13E-08 | -0.79 | 1.29E-08 |
| ORM1      | 160.07  | -0.61 | 1.64E-04 | -0.66 | 9.06E-05 | -0.55 | 1.63E-03 | -0.60 | 4.14E-04 | -0.71 | 3.33E-06 |
| HPR       | 110.13  | -0.68 | 2.06E-04 | -0.60 | 2.42E-03 | -0.51 | 1.39E-02 | -0.53 | 9.21E-03 | 0.36  | 6.50E-02 |
| CA2       | 75.10   | -0.69 | 9.51E-06 | -0.44 | 1.13E-02 | -0.45 | 1.03E-02 | -0.40 | 2.96E-02 | -0.81 | 5.14E-08 |
| IGFBP4    | 297.00  | -0.70 | 1.18E-06 | -0.75 | 5.59E-07 | -0.67 | 6.53E-06 | -0.68 | 7.00E-06 | -0.74 | 1.27E-07 |
| SLC27A2   | 72.13   | -0.71 | 5.05E-06 | -0.40 | 2.61E-02 | -0.49 | 5.65E-03 | -0.32 | 9.87E-02 | -0.60 | 1.37E-04 |
| MYLK      | 49.32   | -0.72 | 1.53E-05 | -0.71 | 4.73E-05 | -0.54 | 4.15E-03 | -0.79 | 2.89E-06 | -1.24 | 3.83E-16 |
| FGFR2     | 108.58  | -0.72 | 4.19E-07 | -0.45 | 4.88E-03 | -0.45 | 5.77E-03 | -0.63 | 4.16E-05 | -0.70 | 7.33E-07 |
| ATF5      | 1231.10 | -0.73 | 6.44E-06 | -0.69 | 5.79E-05 | -0.62 | 3.72E-04 | -0.68 | 5.49E-05 | -0.86 | 1.53E-08 |
| TK1       | 83.16   | -0.76 | 2.85E-07 | -0.47 | 4.89E-03 | -0.55 | 8.91E-04 | -0.67 | 2.56E-05 | -1.56 | 3.69E-28 |
| HIST1H2BM | 58.87   | -0.79 | 1.00E-06 | -0.57 | 1.24E-03 | -0.35 | 8.62E-02 | -0.50 | 7.29E-03 | -1.74 | 1.61E-31 |
| SHCBP1    | 36.59   | -0.81 | 2.94E-06 | -0.46 | 2.25E-02 | -0.45 | 2.79E-02 | -0.37 | 8.23E-02 | -1.09 | 1.11E-11 |
| C5        | 463.25  | -0.85 | 2.10E-08 | -0.70 | 1.87E-05 | -0.77 | 9.00E-07 | -0.48 | 6.86E-03 | -0.53 | 5.92E-04 |
| ASPM      | 79.40   | -0.90 | 2.47E-09 | -0.41 | 2.25E-02 | -0.55 | 1.61E-03 | -0.85 | 1.24E-07 | -1.43 | 2.24E-22 |
| DEPDC1B   | 253.48  | -0.91 | 8.20E-15 | -0.42 | 2.52E-03 | -0.53 | 4.05E-05 | -0.61 | 2.30E-06 | -1.47 | 1.19E-34 |
| CCNB1     | 321.54  | -0.95 | 3.01E-17 | -0.64 | 1.96E-07 | -0.76 | 1.74E-10 | -0.53 | 2.73E-05 | -1.40 | 1.50E-34 |
| CDK1      | 422.06  | -1.06 | 2.29E-16 | -0.36 | 2.37E-02 | -0.51 | 6.85E-04 | -0.52 | 4.25E-04 | -2.05 | 1.52E-57 |
| CENPF     | 51.91   | -1.11 | 4.35E-12 | -0.58 | 2.21E-03 | -0.82 | 1.73E-06 | -0.92 | 8.79E-08 | -1.30 | 6.55E-17 |
| AURKB     | 102.44  | -1.11 | 4.80E-17 | -0.47 | 2.57E-03 | -0.73 | 2.40E-07 | -0.69 | 2.20E-06 | -2.33 | 1.28E-63 |
| KIF2C     | 109.94  | -1.13 | 1.18E-17 | -0.32 | 5.53E-02 | -0.76 | 8.31E-08 | -0.70 | 1.44E-06 | -1.62 | 2.51E-33 |
| CCNA2     | 371.01  | -1.17 | 2.55E-18 | -0.52 | 7.99E-04 | -0.74 | 2.63E-07 | -0.81 | 2.13E-08 | -2.07 | 1.01E-55 |
| TOP2A     | 499.52  | -1.20 | 2.03E-19 | -0.46 | 4.10E-03 | -0.72 | 5.19E-07 | -0.64 | 1.55E-05 | -1.96 | 1.10E-50 |
| CCNB2     | 117.69  | -1.53 | 1.80E-27 | -0.77 | 5.81E-07 | -0.85 | 1.87E-08 | -0.96 | 3.73E-10 | -1.51 | 1.50E-26 |
| UBE2C     | 194.33  | -1.74 | 5.86E-44 | -0.72 | 1.55E-07 | -1.02 | 3.34E-15 | -1.03 | 4.15E-15 | -2.09 | 1.44E-58 |

\*Genes that were commonly significantly differentially expressed among the cells treated with one of the five petroleum substances at the highest concentration used are shown. A total of 66 genes were significantly differentially expressed across all chemicals at the highest concentration used.

**Table S2:** Top-most common, differentially expressed genes\*

| Gene    | Mean count | Con-02 |          | Con-04 |          | Con-12 |          | Con-15 |          | A087/13 |          |
|---------|------------|--------|----------|--------|----------|--------|----------|--------|----------|---------|----------|
|         |            | log2FC | q-value  | log2FC | q-value  | log2FC | q-value  | log2FC | q-value  | log2FC  | q-value  |
| TIPARP  | 61.95      | 1.43   | 2.55E-18 | 1.37   | 5.10E-16 | 1.42   | 3.68E-17 | 1.33   | 4.15E-15 | 1.70    | 1.53E-26 |
| UGT1A1  | 424.06     | 1.11   | 2.22E-12 | 1.03   | 5.70E-10 | 1.06   | 1.32E-10 | 1.02   | 6.48E-10 | 1.05    | 2.23E-11 |
| UGT1A6  | 1027.24    | 1.03   | 4.84E-11 | 0.98   | 2.84E-09 | 1.01   | 4.69E-10 | 0.99   | 1.72E-09 | 0.99    | 1.54E-10 |
| CD44    | 317.20     | 0.81   | 4.90E-10 | 0.61   | 1.87E-05 | 0.48   | 1.61E-03 | 0.57   | 8.81E-05 | 0.31    | 3.34E-02 |
| AKR1C1  | 5518.76    | 0.67   | 4.73E-14 | 0.49   | 4.44E-07 | 0.47   | 1.23E-06 | 0.39   | 8.81E-05 | 0.71    | 3.56E-16 |
| SQSTM1  | 11720.95   | 0.61   | 8.20E-15 | 0.46   | 9.43E-08 | 0.38   | 1.21E-05 | 0.51   | 6.48E-10 | 0.71    | 1.91E-20 |
| ATF3    | 60.12      | 0.57   | 6.16E-04 | 0.65   | 1.49E-04 | 0.44   | 2.01E-02 | 0.60   | 5.57E-04 | 0.51    | 1.56E-03 |
| CDKN1A  | 279.08     | 0.44   | 4.22E-04 | 0.29   | 4.12E-02 | 0.41   | 2.03E-03 | 0.57   | 3.34E-06 | 0.80    | 6.95E-13 |
| ASAH1   | 448.02     | 0.43   | 2.05E-05 | 0.30   | 7.67E-03 | 0.43   | 3.04E-05 | 0.55   | 6.58E-08 | 0.84    | 2.84E-20 |
| AQP3    | 159.39     | 0.42   | 1.23E-03 | 0.40   | 4.43E-03 | 0.35   | 1.65E-02 | 0.60   | 3.23E-06 | 1.04    | 3.04E-20 |
| DEPDC1B | 253.48     | -0.91  | 8.20E-15 | -0.42  | 2.52E-03 | -0.53  | 4.05E-05 | -0.61  | 2.30E-06 | -1.47   | 1.19E-34 |
| CCNB1   | 321.54     | -0.95  | 3.01E-17 | -0.64  | 1.96E-07 | -0.76  | 1.74E-10 | -0.53  | 2.73E-05 | -1.40   | 1.50E-34 |
| CDK1    | 422.06     | -1.06  | 2.29E-16 | -0.36  | 2.37E-02 | -0.51  | 6.85E-04 | -0.52  | 4.25E-04 | -2.05   | 1.52E-57 |
| CENPF   | 51.91      | -1.11  | 4.35E-12 | -0.58  | 2.21E-03 | -0.82  | 1.73E-06 | -0.92  | 8.79E-08 | -1.30   | 6.55E-17 |
| AURKB   | 102.44     | -1.11  | 4.80E-17 | -0.47  | 2.57E-03 | -0.73  | 2.40E-07 | -0.69  | 2.20E-06 | -2.33   | 1.28E-63 |
| KIF2C   | 109.94     | -1.13  | 1.18E-17 | -0.32  | 5.53E-02 | -0.76  | 8.31E-08 | -0.70  | 1.44E-06 | -1.62   | 2.51E-33 |
| CCNA2   | 371.01     | -1.17  | 2.55E-18 | -0.52  | 7.99E-04 | -0.74  | 2.63E-07 | -0.81  | 2.13E-08 | -2.07   | 1.01E-55 |
| TOP2A   | 499.52     | -1.20  | 2.03E-19 | -0.46  | 4.10E-03 | -0.72  | 5.19E-07 | -0.64  | 1.55E-05 | -1.96   | 1.10E-50 |
| CCNB2   | 117.69     | -1.53  | 1.80E-27 | -0.77  | 5.81E-07 | -0.85  | 1.87E-08 | -0.96  | 3.73E-10 | -1.51   | 1.50E-26 |
| UBE2C   | 194.33     | -1.74  | 5.86E-44 | -0.72  | 1.55E-07 | -1.02  | 3.34E-15 | -1.03  | 4.15E-15 | -2.09   | 1.44E-58 |

\*Genes that were commonly significantly differentially expressed among the cells treated with one of the five petroleum substances at the highest concentration used are shown. The top-most differentially expressed (based on log2 fold change) are shown.

**Table S3: Top-most common, differentially expressed genes across different concentrations\***

| Gene   | Mean count | Con-02 low |          | Con-04 low |          | Con-12 low |          | Con-15 low |          | A087/13 low |          | Con-02 mid |          | Con-04 mid |          | Con-12 mid |          | Con-15 mid |          | A087/13 mid |          | Con-02 high |          | Con-04 high |          | Con-12 high |          |
|--------|------------|------------|----------|------------|----------|------------|----------|------------|----------|-------------|----------|------------|----------|------------|----------|------------|----------|------------|----------|-------------|----------|-------------|----------|-------------|----------|-------------|----------|
|        |            | log2FC     | q-value  | log2FC     | q-value  | log2FC     | q-value  | log2FC     | q-value  | log2FC      | q-value  | log2FC     | q-value  | log2FC     | q-value  | log2FC     | q-value  | log2FC     | q-value  | log2FC      | q-value  | log2FC      | q-value  | log2FC      | q-value  | log2FC      | q-value  |
| UGT1A6 | 1027.24    | 0.99       | 2.29E-09 | 1.01       | 2.55E-09 | 0.89       | 2.45E-07 | 1.01       | 1.27E-09 | 0.91        | 7.59E-09 | 1.06       | 1.28E-10 | 1.05       | 1.38E-10 | 1.00       | 1.51E-09 | 0.99       | 1.72E-09 | 0.99        | 1.54E-10 | 1.03        | 4.84E-11 | 0.98        | 2.84E-09 | 1.01        | 4.69E-10 |
| UGT1A1 | 424.06     | 0.90       | 2.39E-07 | 0.98       | 7.01E-09 | 0.93       | 7.19E-08 | 1.05       | 4.18E-10 | 0.96        | 2.00E-09 | 1.00       | 2.58E-09 | 1.02       | 6.34E-10 | 1.05       | 2.95E-10 | 1.02       | 6.48E-10 | 1.05        | 2.23E-11 | 1.11        | 2.22E-12 | 1.03        | 5.70E-10 | 1.06        | 1.32E-10 |
| AKR1C1 | 5518.76    | 0.45       | 1.24E-05 | 0.39       | 0.000234 | 0.39       | 0.000437 | 0.25       | 0.032703 | 0.69        | 5.34E-15 | 0.56       | 2.58E-09 | 0.33       | 0.003092 | 0.33       | 0.005168 | 0.39       | 8.81E-05 | 0.71        | 3.56E-16 | 0.67        | 4.73E-14 | 0.49        | 4.44E-07 | 0.47        | 1.23E-06 |
| ASAH1  | 448.02     | 0.25       | 0.058266 | 0.29       | 0.026679 | 0.27       | 0.061746 | 0.41       | 0.000252 | 0.78        | 2.65E-17 | 0.26       | 0.042478 | 0.34       | 0.003505 | 0.37       | 0.00197  | 0.55       | 6.58E-08 | 0.84        | 2.84E-20 | 0.43        | 2.05E-05 | 0.30        | 0.007667 | 0.43        | 3.04E-05 |
| CTSA   | 7129.24    | 0.18       | 0.04167  | 0.26       | 0.000914 | 0.19       | 0.038094 | 0.36       | 1.45E-07 | 0.44        | 1.79E-12 | 0.19       | 0.027853 | 0.25       | 0.001645 | 0.18       | 0.047653 | 0.34       | 6.37E-07 | 0.48        | 6.48E-15 | 0.31        | 3.74E-06 | 0.30        | 3.05E-05 | 0.25        | 0.000801 |
| CCNB1  | 321.54     | -0.42      | 0.004858 | -0.51      | 0.000217 | -0.42      | 0.004526 | -0.28      | 0.062509 | -1.56       | 6.46E-42 | -0.41      | 0.005406 | -0.50      | 0.00034  | -0.36      | 0.017778 | -0.53      | 2.73E-05 | -1.40       | 1.50E-34 | -0.95       | 3.01E-17 | -0.64       | 1.96E-07 | -0.76       | 1.74E-10 |
| COL4A2 | 112.60     | -0.44      | 0.00987  | -0.45      | 0.007973 | -0.55      | 0.000782 | -0.43      | 0.00779  | -0.79       | 4.15E-09 | -0.48      | 0.003568 | -0.45      | 0.007059 | -0.67      | 5.91E-06 | -0.49      | 0.001202 | -0.86       | 1.47E-10 | -0.47       | 0.00099  | -0.46       | 0.002443 | -0.70       | 5.55E-07 |
| C5     | 463.25     | -0.54      | 0.004858 | -0.43      | 0.035134 | -0.39      | 0.083094 | -0.36      | 0.063893 | -0.55       | 0.000483 | -0.55      | 0.003568 | -0.42      | 0.029957 | -0.46      | 0.026178 | -0.48      | 0.006855 | -0.53       | 0.000592 | -0.85       | 2.10E-08 | -0.70       | 1.87E-05 | -0.77       | 9.00E-07 |
| IGFBP4 | 297.00     | -0.56      | 0.001073 | -0.50      | 0.004336 | -0.51      | 0.004761 | -0.66      | 2.42E-05 | -0.72       | 4.96E-07 | -0.61      | 0.000284 | -0.54      | 0.001565 | -0.41      | 0.035019 | -0.68      | 7.00E-06 | -0.74       | 1.27E-07 | -0.70       | 1.18E-06 | -0.75       | 5.59E-07 | -0.67       | 6.53E-06 |
| COL4A1 | 200.77     | -0.78      | 1.53E-12 | -0.63      | 5.90E-08 | -0.90      | 3.07E-16 | -0.65      | 5.46E-08 | -1.33       | 1.90E-33 | -0.57      | 7.30E-07 | -0.76      | 7.09E-12 | -0.79      | 6.91E-13 | -0.49      | 3.24E-05 | -1.20       | 4.55E-28 | -0.47       | 2.24E-05 | -0.74       | 4.44E-11 | -0.53       | 2.95E-06 |

\*Genes that were commonly significantly differentially expressed among the cells treated with one of the five petroleum substances, at all concentrations, are shown. A total of 10 genes were significantly differentially expressed across all chemicals and concentrations.
